# Supplementary material for: A multi-state supramolecular switch realized via a [π⋯π] dimer
Source: Royal Society of Chemistry journal article supplement (doi:10.1039/d4cp03131h), 2024-11-27
Supplement: d4cp03131h1.pdf [file d4cp03131h1.pdf]

## Supplementary Information

### A multi-state supramolecular switch realized by a $[\pi\cdots\pi]$ dimer

Hua Hao<sup>1\*</sup>, Honghao Li<sup>1</sup>, Ting Jia<sup>1</sup>, and Xiaohong Zheng<sup>2</sup>

1) School of Physics, Hangzhou Normal University, Hangzhou 311121, China. E-mail: [hhao@hznu.edu.cn](mailto:hhao@hznu.edu.cn)

2) College of Information Science and Technology, Nanjing Forestry University, Nanjing 210037, China.

#### Table of Contents

- S1. Details for geometries of supramolecular junctions
- S2. Details for transmission spectra under non-zero gate voltages
- S3. Frontier molecular orbitals for the dimer in SSJs and the free monomer
- S4. Details for plotting Figure 5b and 5c in the main text
- S5. Cartesian coordinates for C1-C5 and central region of a typical junction

## S1. Details for geometries of supramolecular junctions

For the supramolecular junction, the distance ( $d_{\text{ssj}}$ ) between two electrode surfaces is one of important parameters. It is optimized based on a slab-like model shown in Fig. S1. Rigid constraints are applied for atoms of the electrode surface (marked by red-dashed lines), while other atoms are fully relaxed without any constraints for geometric optimizations. “Rigid constraints” mean that the marked Au atoms are regarded as a rigid body with only translational motions, which is determined by the force on the center-of-mass of the rigid body atoms. This optimization scheme could yield a reasonable (though perhaps not optimal)  $d_{\text{ssj}}$  for each conformation of the dimer. If  $d_{\text{ssj}}$  is optimized for C1, conformations other than C1 will be disfavored in the C1-related SSJ, confirmed by our calculations. Moreover, the semi-infinite electrodes are missing in this slab model, when comparing with the full molecular junction shown in Fig. 1b. However, the optimized geometries of the dimer and the interfaces are quite close to those in the full molecular junction. This is indicated by the fact that the increase of the electrode layers in the slab model has little impact on the finally-optimized geometries of the dimer and the interfaces.

Considering the periodic boundary condition, the thickness of the vacuum layer ( $d_{\text{vm}}$ ) between two electrode surfaces is set to be 12 Å, which is large enough to avoid possible interactions between these two surfaces. The lattice parameters in the x and y directions ( $L_x$ ,  $L_y$ ) are 17.8 and 15.4 Å. Other larger supercells, with  $L_x > 17.8$  Å and  $L_y > 15.4$  Å, are tried as well, but geometries of the dimer and the contact interface are little affected. The force criterion for geometry optimizations is less than 0.04 eV/Å. The binding energy in Table S2 is also based on this slab-like model.

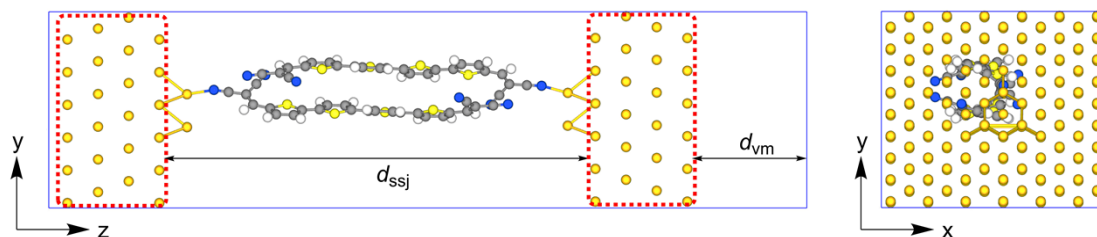

Fig. S1. A typical slab-like model for optimizing the distance between two electrode surfaces of supramolecular junctions. The blue rectangles mark the simulation cell of the slab model. The vacuum layer is only considered in the  $z$  direction, and  $d_{\text{vm}}$  denotes the thickness of this vacuum layer. The red dashed lines mark atoms with rigid constraints for optimizing calculations.

Table S1. The optimized width ( $d_{\text{ssj}}$ ) of the supramolecular junctions with the dimer (Unit=Å).

| Conformation     | C1   | C2   | C3   | C4   | C5   |
|------------------|------|------|------|------|------|
| $d_{\text{ssj}}$ | 34.5 | 37.2 | 39.4 | 43.1 | 45.4 |

Table S2. The binding energy ( $E_b$ ) of the dimer with the electrodes (Unit=eV).

| Conformation       | C1    | C2    | C3    | C4    | C5    |
|--------------------|-------|-------|-------|-------|-------|
| $E_b$              | -2.14 | -2.03 | -1.96 | -1.91 | -1.85 |
| CP-corrected $E_b$ | -1.55 | -1.45 | -1.38 | -1.33 | -1.28 |

## S2. Details for transmission spectra under non-zero gate voltages

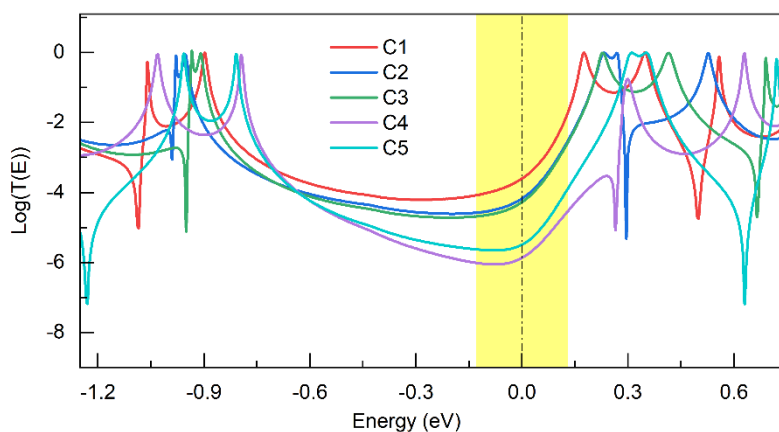

Fig. S2. Transmission spectra for different conformations of the dimer at the gate voltages of -1.0 V. The DQI-induced transmission dip is still present around 0.3 eV for C4, responsible for smallest transmission coefficients of C4 near the Fermi level.

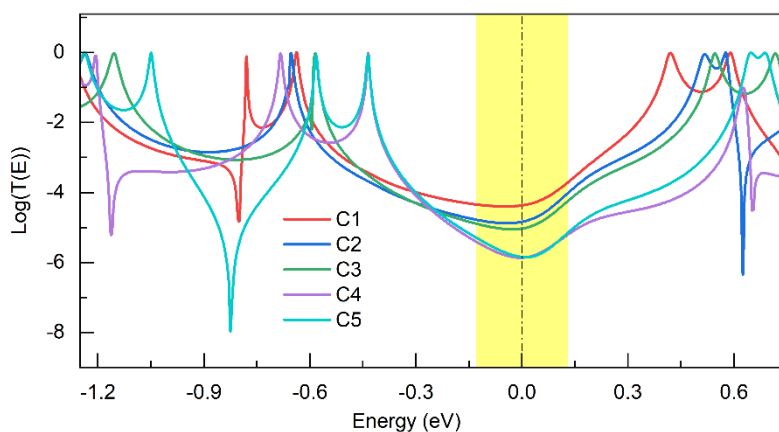

Fig. S3. Transmission spectra for different conformations of the dimer at the gate voltages of -1.5 V. The DQI-induced transmission dip is disrupted by this gate voltage, thus the conductance of C5 is the same as that of C4.

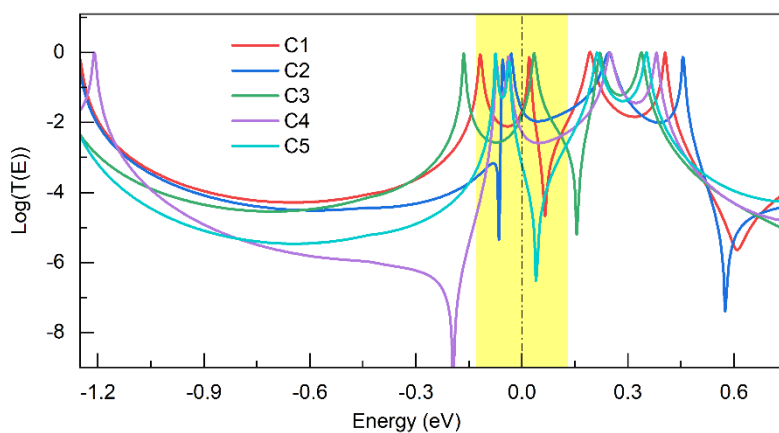

Fig. S4. Transmission spectra for different conformations of the dimer at the gate voltages of +2.5 V. The conductance is generally determined by the transmission peaks related to the LUMO and LUMO+1.

### S3. Frontier molecular orbitals for the dimer in SSJs and the free monomer

The orbital phase patterns of the end group (S or AS in Fig. 5a) are generated by analyzing the plots presented in Fig. S5a. The schematic orbital distributions in Fig. 6a are derived from the two plots in the upper part of Fig. S5b with some simplifications. The  $p_z$  orbitals that are crucial for the interaction between the two monomers have been included in the schematic graphs in Fig. 6a, by carefully comparing the frontier molecular orbitals of the monomer and dimer, especially those in Fig. S5b. The simplifications facilitate a clear understanding of the mechanism for the formation of the OPPs in the end group of the dimer.

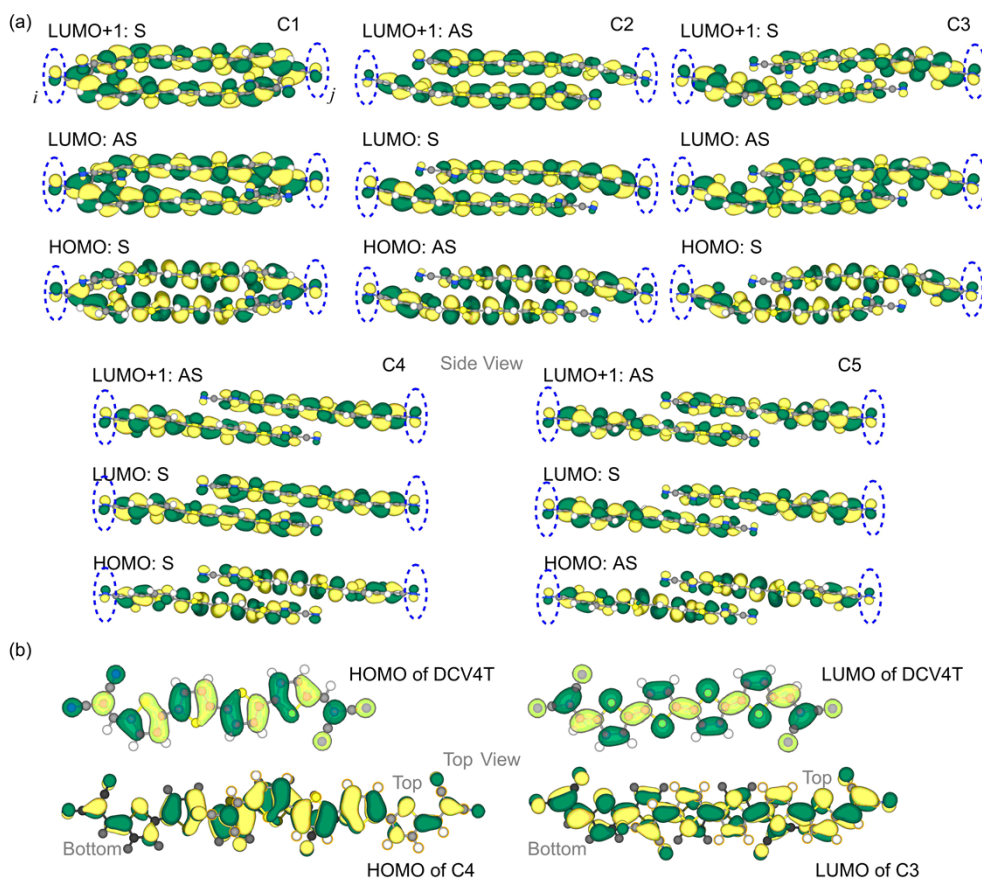

Fig. S5. (a) The frontier molecular orbitals of the dimer in SSJs in the side view. (b) The frontier molecular orbitals of the free DCV4T monomer, C3 and C4 in the top view. The isovalues for plotting these MOs are all the same. The frontier molecular orbitals of the dimer are calculated by the MPSH method at the zero-gate voltage.

#### S4. Details for plotting Figure 5b and 5c in the main text

The explicit equation for plotting Figure 5b and 5c is shown in the following:

$$T_{i,j}(E) \approx |g_{ij}(E)|^2 = \left[ \frac{(E - \varepsilon_1)s_1}{(E - \varepsilon_1)^2 + \eta^2} + \frac{(E - \varepsilon_2)s_2}{(E - \varepsilon_2)^2 + \eta^2} + \frac{(E - \varepsilon_3)s_3}{(E - \varepsilon_3)^2 + \eta^2} \right]^2 + \left[ \frac{\eta s_1}{(E - \varepsilon_1)^2 + \eta^2} + \frac{\eta s_2}{(E - \varepsilon_2)^2 + \eta^2} + \frac{\eta s_3}{(E - \varepsilon_3)^2 + \eta^2} \right]^2$$

The parameters used for the plot are:

$|s_1| = |s_2| = |s_3| = 0.01$ ;  $\varepsilon_1 = -1.0$ ,  $\varepsilon_2 = 0.5$ ,  $\varepsilon_3 = 1.0$ ;  $\eta = 10^{-4}$  is an infinitesimal number. Magnitudes of  $s_n$  are set to be the same by noting orbital profiles of FMOs marked by dashed circles in Fig. S5. The energy  $E$  ranges from -1.25 eV to 1.25 eV with the step of 0.01 eV.

#### S5. Cartesian coordinates for C1-C5 and central region of a typical junction

Molecular coordinates of C1-C5 are listed in the following, which are optimized at PBE-D2/Def2-SVP level using the G16 package. Before performing calculations for electron transport, these coordinates of C1-C5 are reoptimized in SSJs using the QuantumATK package.

To be more reliable, other methods are also considered for the geometry optimizations using the G16 package, such as PBE-D2/def2SVP with the counterpoise correction (CP) correction, PBE-D3BJ/def2SVP without the CP correction and PBE-D3BJ/def2SVP with the CP correction. By analyzing the FMOs of the dimer (the OPPs and the HOMO-LUMO gap), they are little influenced by the optimization method. This indicates the robustness of our revealed electron transport properties based on the double-zeta basis set level and the D2 dispersion correction. Here, the FMOs of the dimer are calculated using the def2TZVP basis set, and the functional and corrections (e.g. dispersion, CP) are consistent with those for the optimization.

##### Coordinates for C1 of the dimer:

|   |             |             |            |
|---|-------------|-------------|------------|
| C | -3.35036800 | 0.03371700  | 1.78733900 |
| C | -3.96757100 | 1.28244900  | 1.98285500 |
| C | -5.37020700 | 1.21182600  | 1.97937200 |
| C | -5.86450600 | -0.08999500 | 1.76779200 |
| S | -4.54023500 | -1.22830300 | 1.57857400 |
| H | -3.39344600 | 2.20747300  | 2.13388900 |
| H | -6.05035700 | 2.06959300  | 2.09301000 |
| C | -1.94940700 | -0.28770900 | 1.74464000 |
| C | -1.34614300 | -1.55158000 | 1.70287700 |
| S | -0.72963600 | 0.97083900  | 1.75118600 |
| C | 0.06192700  | -1.50203900 | 1.67621100 |
| H | -1.93090900 | -2.48262200 | 1.69878800 |
| C | 0.57487400  | -0.19945600 | 1.68927300 |
| H | 0.71010200  | -2.38835600 | 1.62927000 |
| C | 1.94602200  | 0.23208200  | 1.64246400 |
| C | 2.44581500  | 1.51910500  | 1.40746400 |

|   |              |             |             |
|---|--------------|-------------|-------------|
| S | 3.25910800   | -0.90659100 | 1.86573500  |
| C | 3.85258200   | 1.57831300  | 1.39352000  |
| H | 1.78907600   | 2.38172500  | 1.22809200  |
| C | 4.46781800   | 0.34161100  | 1.62793100  |
| H | 4.42830800   | 2.49784000  | 1.21685600  |
| C | 5.87491900   | 0.04659300  | 1.66814800  |
| C | 6.53108000   | -1.14724600 | 2.01248700  |
| S | 7.02432600   | 1.28496500  | 1.22460500  |
| C | 7.93188300   | -1.04626800 | 1.93709300  |
| H | 5.99276900   | -2.06128100 | 2.29940800  |
| C | 8.38571700   | 0.20770600  | 1.48822800  |
| H | 8.62585000   | -1.87213900 | 2.14842000  |
| C | 9.74164200   | 0.53209700  | 1.18917200  |
| C | 10.23148500  | 1.55739600  | 0.38763800  |
| C | -7.24643600  | -0.40763700 | 1.64959000  |
| H | -7.92409600  | 0.44220300  | 1.83221200  |
| C | -7.84601200  | -1.60893400 | 1.28982600  |
| C | 11.64078100  | 1.73675300  | 0.21346400  |
| N | 12.79709200  | 1.89551900  | 0.07684900  |
| C | -9.26571600  | -1.68692700 | 1.13735500  |
| C | -7.10832800  | -2.78700400 | 0.95297400  |
| N | -6.50706300  | -3.75173400 | 0.65014100  |
| N | -10.42758100 | -1.73542100 | 0.96241500  |
| C | 9.37221400   | 2.40181000  | -0.38556200 |
| N | 8.64235700   | 3.03130400  | -1.06123200 |
| H | 10.49337700  | -0.16390200 | 1.59359000  |
| C | -5.87491000  | 0.03825300  | -1.66845300 |
| C | -6.53112300  | -1.15726200 | -2.00683700 |
| C | -7.93191800  | -1.05586900 | -1.93189300 |
| C | -8.38569200  | 0.20032900  | -1.48922100 |
| S | -7.02426800  | 1.27888400  | -1.23115400 |
| H | -5.99284900  | -2.07272100 | -2.28925300 |
| H | -8.62591700  | -1.88276100 | -2.13907800 |
| C | -4.46779900  | 0.33341600  | -1.62977400 |
| C | -3.85250200  | 1.57129600  | -1.40183700 |
| S | -3.25915000  | -0.91607300 | -1.86104500 |
| C | -2.44574100  | 1.51196500  | -1.41557900 |
| H | -4.42819000  | 2.49175800  | -1.22998200 |
| C | -1.94599800  | 0.22373000  | -1.64396200 |
| H | -1.78897700  | 2.37551900  | -1.24085000 |
| C | -0.57486700  | -0.20804800 | -1.68883300 |
| C | -0.06195300  | -1.51058300 | -1.67006700 |
| S | 0.72968500   | 0.96191400  | -1.75587000 |
| C | 1.34611500   | -1.56028400 | -1.69651900 |
| H | -0.71014100  | -2.39668100 | -1.61931400 |
| C | 1.94941100   | -0.29662000 | -1.74376500 |
| H | 1.93085600   | -2.49131500 | -1.68844300 |
| C | 3.35038300   | 0.02458600  | -1.78781600 |
| C | 3.96763000   | 1.27228500  | -1.98967700 |
| S | 4.54019700   | -1.23635100 | -1.57234900 |
| C | 5.37026700   | 1.20166500  | -1.98560000 |
| H | 3.39353400   | 2.19650900  | -2.14563800 |
| C | 5.86451500   | -0.09905900 | -1.76725800 |
| H | 6.05042200   | 2.05884000  | -2.10357800 |
| C | 7.24641300   | -0.41617100 | -1.64730700 |
| C | 7.84587200   | -1.61566400 | -1.28138000 |
| C | -9.74159800  | 0.52625300  | -1.19170900 |
| H | -10.49340500 | -0.17152700 | -1.59291600 |

|   |              |             |             |
|---|--------------|-------------|-------------|
| C | -10.23136200 | 1.55531500  | -0.39496100 |
| C | 9.26555700   | -1.69298400 | -1.12839900 |
| N | 10.42740000  | -1.74066800 | -0.95309200 |
| C | -11.64064600 | 1.73564900  | -0.22171200 |
| C | -9.37203600  | 2.40302700  | 0.37455800  |
| N | -8.64216200  | 3.03529900  | 1.04761200  |
| N | -12.79694800 | 1.89517900  | -0.08592200 |
| C | 7.10806900   | -2.79194100 | -0.93858100 |
| N | 6.50669000   | -3.75504700 | -0.63084500 |
| H | 7.92419100   | 0.43261800  | -1.83431500 |

**Coordinates for C2 of the dimer:**

|   |              |             |             |
|---|--------------|-------------|-------------|
| C | 1.78948200   | -1.77863700 | -0.43309300 |
| C | 2.27226600   | -1.79300000 | -1.75406200 |
| C | 3.66942200   | -1.88609000 | -1.82649800 |
| C | 4.30478300   | -1.93598700 | -0.57029700 |
| S | 3.10465800   | -1.87119100 | 0.71555300  |
| H | 1.60682800   | -1.73983500 | -2.62705300 |
| H | 4.24363800   | -1.91826400 | -2.76329100 |
| C | 0.42721300   | -1.70022900 | 0.01599800  |
| C | -0.06518100  | -1.65193300 | 1.32621500  |
| S | -0.89775900  | -1.65089500 | -1.13390100 |
| C | -1.47001700  | -1.57556100 | 1.39811200  |
| H | 0.59658100   | -1.66734400 | 2.20385700  |
| C | -2.09290000  | -1.56294100 | 0.14278700  |
| H | -2.03769700  | -1.52265300 | 2.33802100  |
| C | -3.49529800  | -1.47506300 | -0.16357900 |
| C | -4.12385300  | -1.43224100 | -1.41478500 |
| S | -4.67998700  | -1.37363600 | 1.12250200  |
| C | -5.52592300  | -1.31368500 | -1.33358800 |
| H | -3.56253100  | -1.47851800 | -2.35850200 |
| C | -6.00407800  | -1.25948800 | -0.01736700 |
| H | -6.19295500  | -1.25794000 | -2.20586600 |
| C | -7.35433300  | -1.08606800 | 0.44525500  |
| C | -7.81446500  | -0.94916800 | 1.76592000  |
| S | -8.66802800  | -0.95799200 | -0.70029800 |
| C | -9.20099200  | -0.74235600 | 1.84032400  |
| H | -7.14238200  | -0.97152300 | 2.63548600  |
| C | -9.83783300  | -0.70669900 | 0.58675400  |
| H | -9.75725700  | -0.58866700 | 2.77543200  |
| C | -11.22784700 | -0.45566800 | 0.40483200  |
| C | -11.96689400 | -0.35741300 | -0.76595300 |
| C | 5.71158100   | -2.04756800 | -0.39568000 |
| H | 6.27787800   | -2.15024000 | -1.33549400 |
| C | 6.47486400   | -2.05294900 | 0.76716900  |
| C | -13.37315000 | -0.09272500 | -0.70905500 |
| N | -14.52800100 | 0.11971800  | -0.65798900 |
| C | 7.89320300   | -2.22608700 | 0.69809800  |
| C | 5.91885900   | -1.84039600 | 2.06617500  |
| N | 5.46727500   | -1.62767000 | 3.13174300  |
| N | 9.05932700   | -2.36841800 | 0.64596500  |
| C | -11.38940000 | -0.50684900 | -2.06637100 |
| N | -10.90714900 | -0.63096900 | -3.13187900 |
| H | -11.78955500 | -0.30977500 | 1.34122000  |
| C | 7.35432400   | 1.08602400  | 0.44509800  |
| C | 7.81445300   | 0.94921500  | 1.76577400  |
| C | 9.20099200   | 0.74249500  | 1.84020300  |

|   |             |             |             |
|---|-------------|-------------|-------------|
| C | 9.83784400  | 0.70681000  | 0.58663700  |
| S | 8.66803800  | 0.95798900  | -0.70043500 |
| H | 7.14235500  | 0.97155400  | 2.63532900  |
| H | 9.75725800  | 0.58887200  | 2.77532100  |
| C | 6.00405700  | 1.25932800  | -0.01753200 |
| C | 5.52586100  | 1.31299400  | -1.33375600 |
| S | 4.68000700  | 1.37404400  | 1.12233800  |
| C | 4.12379400  | 1.43159000  | -1.41496000 |
| H | 6.19286000  | 1.25680100  | -2.20603100 |
| C | 3.49528500  | 1.47497500  | -0.16375400 |
| H | 3.56244100  | 1.47744100  | -2.35867800 |
| C | 2.09289500  | 1.56300700  | 0.14260300  |
| C | 1.47001500  | 1.57587900  | 1.39792700  |
| S | 0.89776300  | 1.65079500  | -1.13409800 |
| C | 0.06517800  | 1.65225900  | 1.32601400  |
| H | 2.03769200  | 1.52310600  | 2.33784400  |
| C | -0.42721300 | 1.70027300  | 0.01578500  |
| H | -0.59658600 | 1.66781500  | 2.20365100  |
| C | -1.78948300 | 1.77847900  | -0.43333500 |
| C | -2.27226500 | 1.79233900  | -1.75430900 |
| S | -3.10466400 | 1.87137300  | 0.71527900  |
| C | -3.66942800 | 1.88528400  | -1.82678000 |
| H | -1.60682300 | 1.73889000  | -2.62728100 |
| C | -4.30479500 | 1.93559400  | -0.57059900 |
| H | -4.24364800 | 1.91706800  | -2.76358400 |
| C | -5.71159600 | 2.04718800  | -0.39602200 |
| C | -6.47488500 | 2.05292000  | 0.76682300  |
| C | 11.22787500 | 0.45585400  | 0.40473900  |
| H | 11.78958300 | 0.31004000  | 1.34113900  |
| C | 11.96693700 | 0.35758800  | -0.76603600 |
| C | -7.89321800 | 2.22608600  | 0.69769900  |
| N | -9.05933000 | 2.36850100  | 0.64552300  |
| C | 13.37320900 | 0.09298800  | -0.70911500 |
| C | 11.38944300 | 0.50692900  | -2.06646500 |
| N | 10.90718800 | 0.63097700  | -3.13198000 |
| N | 14.52807200 | -0.11938500 | -0.65803100 |
| C | -5.91889200 | 1.84075100  | 2.06589900  |
| N | -5.46733200 | 1.62831800  | 3.13153500  |
| H | -6.27789700 | 2.14954900  | -1.33586800 |

**Coordinates for C3 of the dimer:**

|   |             |            |             |
|---|-------------|------------|-------------|
| C | -0.73925600 | 1.82205700 | -0.33171000 |
| C | -1.25261400 | 1.99057300 | -1.63093500 |
| C | -2.65237700 | 2.08074200 | -1.65890300 |
| C | -3.25537300 | 1.96959400 | -0.38999100 |
| S | -2.02502500 | 1.75261200 | 0.84688300  |
| H | -0.60665600 | 2.06421100 | -2.51700200 |
| H | -3.24852700 | 2.22781400 | -2.57094300 |
| C | 0.63342900  | 1.71906500 | 0.08417600  |
| C | 1.16980700  | 1.76782800 | 1.37782600  |
| S | 1.91048400  | 1.52213900 | -1.09959400 |
| C | 2.57406400  | 1.64988900 | 1.41106000  |
| H | 0.54156200  | 1.88560700 | 2.27242400  |
| C | 3.14707400  | 1.50441300 | 0.14009000  |
| H | 3.16889600  | 1.60960000 | 2.33468700  |
| C | 4.52676600  | 1.31168500 | -0.21803200 |
| C | 5.05804900  | 0.87076800 | -1.43781100 |



|   |              |             |             |
|---|--------------|-------------|-------------|
| S | 5.80641000   | 1.58247800  | 0.94445400  |
| C | 6.46032900   | 0.73009900  | -1.42170700 |
| H | 4.42264500   | 0.63060000  | -2.30213400 |
| C | 7.03839700   | 1.06327300  | -0.18985000 |
| H | 7.05637300   | 0.37523400  | -2.27480500 |
| C | 8.41739200   | 0.98006600  | 0.20733400  |
| C | 8.97718300   | 1.23277200  | 1.47045100  |
| S | 9.62908600   | 0.43754100  | -0.92616600 |
| C | 10.35720700  | 0.98815800  | 1.51380900  |
| H | 8.37824700   | 1.56434700  | 2.33025000  |
| C | 10.89288800  | 0.54356600  | 0.28911600  |
| H | 10.98444200  | 1.11406200  | 2.40759200  |
| C | 12.26645000  | 0.22742900  | 0.08787200  |
| C | 12.92301300  | -0.21292200 | -1.05485700 |
| C | -4.65818900  | 2.02802900  | -0.15784100 |
| H | -5.26200600  | 2.24349000  | -1.05362700 |
| C | -5.37343700  | 1.84648400  | 1.02096600  |
| C | 14.33143500  | -0.46958400 | -1.01863700 |
| N | 15.48793500  | -0.67706200 | -0.98348400 |
| C | -6.79836900  | 1.97568900  | 1.03238400  |
| C | -4.75263300  | 1.46958600  | 2.25326300  |
| N | -4.23872400  | 1.12071400  | 3.25249100  |
| N | -7.97032300  | 2.07344100  | 1.04816300  |
| C | 12.25747000  | -0.43038200 | -2.30232500 |
| N | 11.70610900  | -0.60653000 | -3.32624800 |
| H | 12.89740500  | 0.35386300  | 0.98254000  |
| C | -8.41736400  | -0.96223900 | 0.27450400  |
| C | -8.97705000  | -1.12614200 | 1.55223800  |
| C | -10.35703900 | -0.87896500 | 1.57857800  |
| C | -10.89285700 | -0.52102300 | 0.32588100  |
| S | -9.62914900  | -0.50001600 | -0.89394600 |
| H | -8.37810500  | -1.39697700 | 2.43304700  |
| H | -10.98416600 | -0.94212800 | 2.47904800  |
| C | -7.03842800  | -1.07321800 | -0.11604000 |
| C | -6.46026300  | -0.82670700 | -1.36809600 |
| S | -5.80653300  | -1.51240700 | 1.05170900  |
| C | -5.05800200  | -0.96828000 | -1.37427200 |
| H | -7.05617000  | -0.53236100 | -2.24401200 |
| C | -4.52685100  | -1.32342400 | -0.12680300 |
| H | -4.42241100  | -0.78912000 | -2.25312200 |
| C | -3.14719000  | -1.49138500 | 0.24370500  |
| C | -2.57431300  | -1.55021600 | 1.52166300  |
| S | -1.91045300  | -1.59306000 | -0.99179300 |
| C | -1.17003600  | -1.67019000 | 1.49670700  |
| H | -3.16935300  | -1.44732400 | 2.44028400  |
| C | -0.63349000  | -1.70939400 | 0.20279800  |
| H | -0.54201100  | -1.72721100 | 2.39737800  |
| C | 0.73915700   | -1.84037300 | -0.20530100 |
| C | 1.25206700   | -2.09645100 | -1.49033600 |
| S | 2.02540300   | -1.69142600 | 0.96538200  |
| C | 2.65181800   | -2.18822400 | -1.51271000 |
| H | 0.60576700   | -2.22985000 | -2.36913600 |
| C | 3.25529500   | -1.99123100 | -0.25450100 |
| H | 3.24760400   | -2.39675400 | -2.41292700 |
| C | 4.65822000   | -2.03347700 | -0.01940800 |
| C | 5.37394500   | -1.77134400 | 1.14385000  |
| C | -12.26651700 | -0.22013700 | 0.10312200  |
| H | -12.89728500 | -0.28339500 | 1.00459300  |

|   |              |             |             |
|---|--------------|-------------|-------------|
| C | -12.92343200 | 0.13826100  | -1.06770600 |
| C | 6.79885100   | -1.89977000 | 1.16376700  |
| N | 7.97077500   | -1.99654500 | 1.18631800  |
| C | -14.33194400 | 0.39632000  | -1.04942100 |
| C | -12.25819400 | 0.26725100  | -2.32756000 |
| N | -11.70704000 | 0.37078400  | -3.36146200 |
| N | -15.48852300 | 0.60530500  | -1.02878200 |
| C | 4.75375400   | -1.31073400 | 2.34766700  |
| N | 4.24056300   | -0.89388600 | 3.32088100  |
| H | 5.26173500   | -2.30970300 | -0.89857300 |

**Coordinates for C4 of the dimer:**

|   |              |             |             |
|---|--------------|-------------|-------------|
| C | 1.01568900   | 0.62520200  | 1.59297200  |
| C | 0.60147600   | 1.96631000  | 1.66644100  |
| C | -0.78520900  | 2.10491600  | 1.82606400  |
| C | -1.47608600  | 0.87900100  | 1.88361100  |
| S | -0.34667900  | -0.46288500 | 1.75485300  |
| H | 1.30491800   | 2.80645700  | 1.58349600  |
| H | -1.31170400  | 3.06766700  | 1.89212000  |
| C | 2.34230500   | 0.11139300  | 1.39811500  |
| C | 2.74642400   | -1.20666600 | 1.15727500  |
| S | 3.73561700   | 1.18273600  | 1.42952400  |
| C | 4.13968000   | -1.34699300 | 0.99767300  |
| H | 2.03477300   | -2.03927600 | 1.06563800  |
| C | 4.84170400   | -0.13938400 | 1.10935600  |
| H | 4.63503000   | -2.30127100 | 0.77031500  |
| C | 6.25155700   | 0.09877100  | 0.96229600  |
| C | 6.93437700   | 1.32169500  | 0.92051700  |
| S | 7.36120500   | -1.23325000 | 0.73282900  |
| C | 8.31694100   | 1.18292600  | 0.69696500  |
| H | 6.42275500   | 2.28846200  | 1.02985800  |
| C | 8.72658100   | -0.15068500 | 0.56253900  |
| H | 9.01715700   | 2.02655200  | 0.61562500  |
| C | 10.04759600  | -0.66392000 | 0.31915000  |
| C | 10.43873800  | -1.99503800 | 0.09139000  |
| S | 11.42421700  | 0.41448400  | 0.27542100  |
| C | 11.81933300  | -2.13207200 | -0.11681800 |
| H | 9.72148500   | -2.82761000 | 0.06971900  |
| C | 12.52736200  | -0.91541700 | -0.05517100 |
| H | 12.32697300  | -3.08650100 | -0.31662400 |
| C | 13.93473400  | -0.80228500 | -0.23709600 |
| C | 14.75301700  | 0.32077800  | -0.20338900 |
| C | -2.88749900  | 0.76679900  | 2.01410700  |
| H | -3.41558700  | 1.73186200  | 2.07351300  |
| C | -3.69496500  | -0.36347500 | 2.07442200  |
| C | 16.16253100  | 0.18646400  | -0.41765800 |
| N | 17.31882500  | 0.06904800  | -0.59394100 |
| C | -5.11376700  | -0.22133600 | 2.19181600  |
| C | -3.18515200  | -1.69687100 | 1.99767600  |
| N | -2.77103400  | -2.79519100 | 1.91927800  |
| N | -6.28029100  | -0.09748600 | 2.27403200  |
| C | 14.25758700  | 1.64031500  | 0.04049300  |
| N | 13.84600200  | 2.72354800  | 0.24232300  |
| H | 14.44521500  | -1.75901800 | -0.43396800 |
| C | -10.04677000 | -0.65017000 | -0.34243900 |
| C | -10.43725900 | -1.98932500 | -0.16664100 |
| C | -11.81769000 | -2.13494600 | 0.03682000  |

|   |              |             |             |
|---|--------------|-------------|-------------|
| C | -12.52622800 | -0.91710200 | 0.02311400  |
| S | -11.42380500 | 0.42513300  | -0.25601100 |
| H | -9.71965200  | -2.82179900 | -0.17774900 |
| H | -12.32483400 | -3.09665000 | 0.19956200  |
| C | -8.72609700  | -0.12721100 | -0.56620200 |
| C | -8.31690100  | 1.21087000  | -0.64678600 |
| S | -7.36068100  | -1.20163400 | -0.78168900 |
| C | -6.93458800  | 1.35895400  | -0.86582800 |
| H | -9.01723400  | 2.05029300  | -0.53048700 |
| C | -6.25154400  | 0.13890000  | -0.95780600 |
| H | -6.42321300  | 2.32946800  | -0.93620300 |
| C | -4.84177200  | -0.09261600 | -1.11577300 |
| C | -4.13915900  | -1.30346000 | -1.05368700 |
| S | -3.73650200  | 1.24187600  | -1.38313900 |
| C | -2.74610900  | -1.15611700 | -1.20855000 |
| H | -4.63383700  | -2.26643800 | -0.86482000 |
| C | -2.34276100  | 0.17080300  | -1.39619300 |
| H | -2.03393400  | -1.99134300 | -1.15105500 |
| C | -1.01636100  | 0.69233200  | -1.57074200 |
| C | -0.60213500  | 2.03531800  | -1.59090200 |
| S | 0.34610900   | -0.38847300 | -1.77483200 |
| C | 0.78466500   | 2.18011400  | -1.74397500 |
| H | -1.30569200  | 2.87151100  | -1.47536400 |
| C | 1.47553500   | 0.95738100  | -1.84960500 |
| H | 1.31119400   | 3.14472000  | -1.77155300 |
| C | 2.88697700   | 0.85002300  | -1.98376100 |
| C | 3.69398200   | -0.27725400 | -2.08959300 |
| C | -13.93353400 | -0.81170300 | 0.21013500  |
| H | -14.44355000 | -1.77557500 | 0.36988600  |
| C | -14.75224600 | 0.31150500  | 0.22067300  |
| C | 5.11290800   | -0.13098500 | -2.20026400 |
| N | 6.27953200   | -0.00432600 | -2.27658100 |
| C | -16.16158000 | 0.16841100  | 0.43039400  |
| C | -14.25746200 | 1.63973500  | 0.02804400  |
| N | -13.84644300 | 2.73017800  | -0.13173300 |
| N | -17.31772500 | 0.04379000  | 0.60266400  |
| C | 3.18371800   | -1.61249300 | -2.06786600 |
| N | 2.76931000   | -2.71300400 | -2.03481100 |
| H | 3.41553200   | 1.81644400  | -2.00370100 |

**Coordinates for C5 of the dimer:**

|   |             |             |             |
|---|-------------|-------------|-------------|
| C | -2.29428800 | 0.96412900  | -1.44435000 |
| C | -1.98849300 | 2.33733800  | -1.50384500 |
| C | -0.61681700 | 2.58642100  | -1.65145200 |
| C | 0.17192700  | 1.42017500  | -1.70649300 |
| S | -0.84898600 | -0.00898800 | -1.58179100 |
| H | -2.75928900 | 3.11728500  | -1.42843200 |
| H | -0.16857300 | 3.58836100  | -1.71285900 |
| C | -3.57654300 | 0.34691400  | -1.25533800 |
| C | -3.87203500 | -0.99900300 | -0.99250100 |
| S | -5.04334500 | 1.30685600  | -1.27458600 |
| C | -5.24376700 | -1.23729900 | -0.78752500 |
| H | -3.09398400 | -1.77053000 | -0.90325000 |
| C | -6.03264100 | -0.08271200 | -0.88822000 |
| H | -5.66518000 | -2.21959600 | -0.53203600 |
| C | -7.45193100 | 0.05569100  | -0.70417600 |
| C | -8.21138400 | 1.22803500  | -0.59196900 |

|   |              |             |             |
|---|--------------|-------------|-------------|
| S | -8.47934600  | -1.35671400 | -0.57571400 |
| C | -9.58620100  | 0.98908500  | -0.40135700 |
| H | -7.75717600  | 2.22828100  | -0.62423300 |
| C | -9.91512200  | -0.37293600 | -0.36052400 |
| H | -10.33859100 | 1.78156100  | -0.27911600 |
| C | -11.20464000 | -0.98215900 | -0.17571600 |
| C | -11.51832800 | -2.34927000 | -0.07513700 |
| S | -12.64316400 | 0.00560800  | -0.04701600 |
| C | -12.88968400 | -2.58511700 | 0.10449300  |
| H | -10.75436100 | -3.13781600 | -0.12776700 |
| C | -13.66816500 | -1.41160100 | 0.14672700  |
| H | -13.34141500 | -3.58200900 | 0.20810400  |
| C | -15.08086900 | -1.39807700 | 0.32111400  |
| C | -15.96407600 | -0.32636600 | 0.38083100  |
| C | 1.58623400   | 1.42461400  | -1.84348900 |
| H | 2.02910600   | 2.42937900  | -1.93434700 |
| C | 2.48820500   | 0.36570300  | -1.87639300 |
| C | -17.36449000 | -0.56213900 | 0.56481600  |
| N | -18.51284800 | -0.76305800 | 0.71581100  |
| C | 3.88932000   | 0.61806800  | -2.01652600 |
| C | 2.09907900   | -1.00045500 | -1.72538800 |
| N | 1.79578000   | -2.12682300 | -1.57111700 |
| N | 5.04184800   | 0.82767000  | -2.12180900 |
| C | -15.54581400 | 1.03662600  | 0.26553300  |
| N | -15.19714300 | 2.15591200  | 0.16969100  |
| H | -15.53499800 | -2.39709200 | 0.42319700  |
| C | 11.20479900  | -0.98262600 | 0.17450400  |
| C | 11.51871000  | -2.34955200 | 0.07213800  |
| C | 12.89013800  | -2.58495200 | -0.10753100 |
| C | 13.66845300  | -1.41126500 | -0.14801500 |
| S | 12.64320000  | 0.00552800  | 0.04743100  |
| H | 10.75484900  | -3.13828200 | 0.12354400  |
| H | 13.34203900  | -3.58163600 | -0.21239700 |
| C | 9.91515400   | -0.37384400 | 0.35989600  |
| C | 9.58601100   | 0.98807100  | 0.40242800  |
| S | 8.47950700   | -1.35812600 | 0.57366100  |
| C | 8.21112300   | 1.22656200  | 0.59313500  |
| H | 10.33828800  | 1.78081900  | 0.28127300  |
| C | 7.45185100   | 0.05395300  | 0.70372600  |
| H | 7.75671500   | 2.22667800  | 0.62650000  |
| C | 6.03254400   | -0.08490300 | 0.88733600  |
| C | 5.24367500   | -1.23923600 | 0.78377900  |
| S | 5.04323700   | 1.30374100  | 1.27697100  |
| C | 3.87192100   | -1.00141100 | 0.98918500  |
| H | 5.66510400   | -2.22089600 | 0.52588400  |
| C | 3.57642700   | 0.34386700  | 1.25527300  |
| H | 3.09385400   | -1.77268300 | 0.89789100  |
| C | 2.29415700   | 0.96062100  | 1.44569600  |
| C | 1.98832500   | 2.33367900  | 1.50840900  |
| S | 0.84888000   | -0.01285200 | 1.58082700  |
| C | 0.61664200   | 2.58237700  | 1.65661000  |
| H | 2.75910100   | 3.11382100  | 1.43483200  |
| C | -0.17206800  | 1.41598300  | 1.70892400  |
| H | 0.16837200   | 3.58415900  | 1.72038300  |
| C | -1.58637200  | 1.42005000  | 1.84598400  |
| C | -2.48829200  | 0.36102100  | 1.87641500  |
| C | 15.08119100  | -1.39729400 | -0.32208900 |
| H | 15.53549100  | -2.39610400 | -0.42542100 |

|   |             |             |             |
|---|-------------|-------------|-------------|
| C | 15.96425000 | -0.32537200 | -0.38018000 |
| C | -3.88941500 | 0.61296100  | 2.01721900  |
| N | -5.04196100 | 0.82219900  | 2.12302500  |
| C | 17.36473800 | -0.56068900 | -0.56418700 |
| C | 15.54576000 | 1.03740100  | -0.26313700 |
| N | 15.19690100 | 2.15650500  | -0.16587400 |
| N | 18.51315800 | -0.76123300 | -0.71521100 |
| C | -2.09911300 | -1.00475700 | 1.72213500  |
| N | -1.79578200 | -2.13074600 | 1.56518200  |
| H | -2.02927900 | 2.42457900  | 1.93923900  |

### Coordinates for central region of a typical junction:

The unit cell for the central region is  $L_x=17.8191$ ,  $L_y= 15.4318$  and  $L_z= 60.0653$

|    |              |              |             |
|----|--------------|--------------|-------------|
| Au | 0.744232600  | 0.386736000  | 1.212436000 |
| Au | 3.714081000  | 0.386736000  | 1.212436000 |
| Au | 6.683930000  | 0.386736000  | 1.212436000 |
| Au | 9.653778000  | 0.386736000  | 1.212436000 |
| Au | 12.623630000 | 0.386736000  | 1.212436000 |
| Au | 15.593470000 | 0.386736000  | 1.212436000 |
| Au | 2.229157000  | 2.958700000  | 1.212436000 |
| Au | 5.199005000  | 2.958700000  | 1.212436000 |
| Au | 8.168854000  | 2.958700000  | 1.212436000 |
| Au | 11.138700000 | 2.958700000  | 1.212436000 |
| Au | 14.108550000 | 2.958700000  | 1.212436000 |
| Au | 17.078400000 | 2.958700000  | 1.212436000 |
| Au | 0.744232600  | 5.530664000  | 1.212436000 |
| Au | 3.714081000  | 5.530664000  | 1.212436000 |
| Au | 6.683930000  | 5.530664000  | 1.212436000 |
| Au | 9.653778000  | 5.530664000  | 1.212436000 |
| Au | 12.623630000 | 5.530664000  | 1.212436000 |
| Au | 15.593470000 | 5.530664000  | 1.212436000 |
| Au | 2.229157000  | 8.102629000  | 1.212436000 |
| Au | 5.199005000  | 8.102629000  | 1.212436000 |
| Au | 8.168854000  | 8.102629000  | 1.212436000 |
| Au | 11.138700000 | 8.102629000  | 1.212436000 |
| Au | 14.108550000 | 8.102629000  | 1.212436000 |
| Au | 17.078400000 | 8.102629000  | 1.212436000 |
| Au | 0.744232600  | 10.674590000 | 1.212436000 |
| Au | 3.714081000  | 10.674590000 | 1.212436000 |
| Au | 6.683930000  | 10.674590000 | 1.212436000 |
| Au | 9.653778000  | 10.674590000 | 1.212436000 |
| Au | 12.623630000 | 10.674590000 | 1.212436000 |
| Au | 15.593470000 | 10.674590000 | 1.212436000 |
| Au | 2.229157000  | 13.246560000 | 1.212436000 |
| Au | 5.199005000  | 13.246560000 | 1.212436000 |
| Au | 8.168854000  | 13.246560000 | 1.212436000 |
| Au | 11.138700000 | 13.246560000 | 1.212436000 |
| Au | 14.108550000 | 13.246560000 | 1.212436000 |
| Au | 17.078400000 | 13.246560000 | 1.212436000 |
| Au | 2.229157000  | 1.244057000  | 3.637307000 |
| Au | 5.199005000  | 1.244057000  | 3.637307000 |
| Au | 8.168854000  | 1.244057000  | 3.637307000 |
| Au | 11.138700000 | 1.244057000  | 3.637307000 |
| Au | 14.108550000 | 1.244057000  | 3.637307000 |
| Au | 17.078400000 | 1.244057000  | 3.637307000 |
| Au | 0.744232600  | 3.816022000  | 3.637307000 |
| Au | 3.714081000  | 3.816022000  | 3.637307000 |

|    |              |              |             |
|----|--------------|--------------|-------------|
| Au | 6.683930000  | 3.816022000  | 3.637307000 |
| Au | 9.653778000  | 3.816022000  | 3.637307000 |
| Au | 12.623630000 | 3.816022000  | 3.637307000 |
| Au | 15.593470000 | 3.816022000  | 3.637307000 |
| Au | 2.229157000  | 6.387986000  | 3.637307000 |
| Au | 5.199005000  | 6.387986000  | 3.637307000 |
| Au | 8.168854000  | 6.387986000  | 3.637307000 |
| Au | 11.138700000 | 6.387986000  | 3.637307000 |
| Au | 14.108550000 | 6.387986000  | 3.637307000 |
| Au | 17.078400000 | 6.387986000  | 3.637307000 |
| Au | 0.744232600  | 8.959950000  | 3.637307000 |
| Au | 3.714081000  | 8.959950000  | 3.637307000 |
| Au | 6.683930000  | 8.959950000  | 3.637307000 |
| Au | 9.653778000  | 8.959950000  | 3.637307000 |
| Au | 12.623630000 | 8.959950000  | 3.637307000 |
| Au | 15.593470000 | 8.959950000  | 3.637307000 |
| Au | 2.229157000  | 11.531910000 | 3.637307000 |
| Au | 5.199005000  | 11.531910000 | 3.637307000 |
| Au | 8.168854000  | 11.531910000 | 3.637307000 |
| Au | 11.138700000 | 11.531910000 | 3.637307000 |
| Au | 14.108550000 | 11.531910000 | 3.637307000 |
| Au | 17.078400000 | 11.531910000 | 3.637307000 |
| Au | 0.744232600  | 14.103880000 | 3.637307000 |
| Au | 3.714081000  | 14.103880000 | 3.637307000 |
| Au | 6.683930000  | 14.103880000 | 3.637307000 |
| Au | 9.653778000  | 14.103880000 | 3.637307000 |
| Au | 12.623630000 | 14.103880000 | 3.637307000 |
| Au | 15.593470000 | 14.103880000 | 3.637307000 |
| Au | 0.744232600  | 2.101379000  | 6.062178000 |
| Au | 3.714081000  | 2.101379000  | 6.062178000 |
| Au | 6.683930000  | 2.101379000  | 6.062178000 |
| Au | 9.653778000  | 2.101379000  | 6.062178000 |
| Au | 12.623630000 | 2.101379000  | 6.062178000 |
| Au | 15.593470000 | 2.101379000  | 6.062178000 |
| Au | 2.229157000  | 4.673343000  | 6.062178000 |
| Au | 5.199005000  | 4.673343000  | 6.062178000 |
| Au | 8.168854000  | 4.673343000  | 6.062178000 |
| Au | 11.138700000 | 4.673343000  | 6.062178000 |
| Au | 14.108550000 | 4.673343000  | 6.062178000 |
| Au | 17.078400000 | 4.673343000  | 6.062178000 |
| Au | 0.744232600  | 7.245307000  | 6.062178000 |
| Au | 3.714081000  | 7.245307000  | 6.062178000 |
| Au | 6.683930000  | 7.245307000  | 6.062178000 |
| Au | 9.653778000  | 7.245307000  | 6.062178000 |
| Au | 12.623630000 | 7.245307000  | 6.062178000 |
| Au | 15.593470000 | 7.245307000  | 6.062178000 |
| Au | 2.229157000  | 9.817272000  | 6.062178000 |
| Au | 5.199005000  | 9.817272000  | 6.062178000 |
| Au | 8.168854000  | 9.817272000  | 6.062178000 |
| Au | 11.138700000 | 9.817272000  | 6.062178000 |
| Au | 14.108550000 | 9.817272000  | 6.062178000 |
| Au | 17.078400000 | 9.817272000  | 6.062178000 |
| Au | 0.744232600  | 12.389240000 | 6.062178000 |
| Au | 3.714081000  | 12.389240000 | 6.062178000 |
| Au | 6.683930000  | 12.389240000 | 6.062178000 |
| Au | 9.653778000  | 12.389240000 | 6.062178000 |
| Au | 12.623630000 | 12.389240000 | 6.062178000 |
| Au | 15.593470000 | 12.389240000 | 6.062178000 |

|    |              |              |              |
|----|--------------|--------------|--------------|
| Au | 2.229157000  | 14.961200000 | 6.062178000  |
| Au | 5.199005000  | 14.961200000 | 6.062178000  |
| Au | 8.168854000  | 14.961200000 | 6.062178000  |
| Au | 11.138700000 | 14.961200000 | 6.062178000  |
| Au | 14.108550000 | 14.961200000 | 6.062178000  |
| Au | 17.078400000 | 14.961200000 | 6.062178000  |
| Au | 0.744232600  | 0.386736000  | 8.487049000  |
| Au | 3.714081000  | 0.386736000  | 8.487049000  |
| Au | 6.683930000  | 0.386736000  | 8.487049000  |
| Au | 9.653778000  | 0.386736000  | 8.487049000  |
| Au | 12.623630000 | 0.386736000  | 8.487049000  |
| Au | 15.593470000 | 0.386736000  | 8.487049000  |
| Au | 2.229157000  | 2.958700000  | 8.487049000  |
| Au | 5.199005000  | 2.958700000  | 8.487049000  |
| Au | 8.168854000  | 2.958700000  | 8.487049000  |
| Au | 11.138700000 | 2.958700000  | 8.487049000  |
| Au | 14.108550000 | 2.958700000  | 8.487049000  |
| Au | 17.078400000 | 2.958700000  | 8.487049000  |
| Au | 0.744232600  | 5.530664000  | 8.487049000  |
| Au | 3.714081000  | 5.530664000  | 8.487049000  |
| Au | 6.683930000  | 5.530664000  | 8.487049000  |
| Au | 9.653778000  | 5.530664000  | 8.487049000  |
| Au | 12.623630000 | 5.530664000  | 8.487049000  |
| Au | 15.593470000 | 5.530664000  | 8.487049000  |
| Au | 2.229157000  | 8.102629000  | 8.487049000  |
| Au | 5.199005000  | 8.102629000  | 8.487049000  |
| Au | 8.168854000  | 8.102629000  | 8.487049000  |
| Au | 11.138700000 | 8.102629000  | 8.487049000  |
| Au | 14.108550000 | 8.102629000  | 8.487049000  |
| Au | 17.078400000 | 8.102629000  | 8.487049000  |
| Au | 0.744232600  | 10.674590000 | 8.487049000  |
| Au | 3.714081000  | 10.674590000 | 8.487049000  |
| Au | 6.683930000  | 10.674590000 | 8.487049000  |
| Au | 9.653778000  | 10.674590000 | 8.487049000  |
| Au | 12.623630000 | 10.674590000 | 8.487049000  |
| Au | 15.593470000 | 10.674590000 | 8.487049000  |
| Au | 2.229157000  | 13.246560000 | 8.487049000  |
| Au | 5.199005000  | 13.246560000 | 8.487049000  |
| Au | 8.168854000  | 13.246560000 | 8.487049000  |
| Au | 11.138700000 | 13.246560000 | 8.487049000  |
| Au | 14.108550000 | 13.246560000 | 8.487049000  |
| Au | 17.078400000 | 13.246560000 | 8.487049000  |
| Au | 11.101850000 | 6.351860000  | 10.675380000 |
| Au | 9.630907000  | 8.933099000  | 10.677360000 |
| Au | 8.200177000  | 6.347920000  | 10.677970000 |
| N  | 9.756023000  | 9.315163000  | 12.805420000 |
| C  | 9.811817000  | 9.136445000  | 13.969080000 |
| C  | 9.910846000  | 8.955201000  | 15.363250000 |
| H  | 7.883048000  | 9.495010000  | 15.686970000 |
| C  | 11.185490000 | 8.545082000  | 15.838010000 |
| C  | 8.808719000  | 9.194603000  | 16.194820000 |
| N  | 12.242660000 | 8.200669000  | 16.224970000 |
| C  | 8.702640000  | 9.111399000  | 17.593170000 |
| H  | 6.597891000  | 9.702023000  | 17.800010000 |
| C  | 7.515571000  | 9.387376000  | 18.308920000 |
| S  | 9.985962000  | 8.657730000  | 18.708990000 |
| C  | 7.641771000  | 9.237972000  | 19.685160000 |
| C  | 8.933345000  | 8.849800000  | 20.087380000 |

|   |              |              |              |
|---|--------------|--------------|--------------|
| H | 6.841902000  | 9.424072000  | 20.406800000 |
| H | 11.577930000 | 8.500995000  | 21.168310000 |
| C | 9.405634000  | 8.616272000  | 21.413070000 |
| C | 10.724130000 | 8.446721000  | 21.850590000 |
| S | 8.299116000  | 8.502129000  | 22.760280000 |
| C | 10.830150000 | 8.244394000  | 23.231240000 |
| N | 9.573479000  | 11.531920000 | 23.698550000 |
| H | 11.777930000 | 8.123475000  | 23.764540000 |
| C | 9.597571000  | 8.247043000  | 23.892970000 |
| C | 9.475456000  | 11.454050000 | 24.868130000 |
| C | 9.342405000  | 8.113316000  | 25.293510000 |
| H | 7.211909000  | 8.574404000  | 25.480380000 |
| C | 8.140735000  | 8.291622000  | 25.983970000 |
| C | 9.354753000  | 11.347050000 | 26.282210000 |
| S | 10.629080000 | 7.722857000  | 26.409820000 |
| H | 11.435840000 | 11.121820000 | 26.531780000 |
| C | 8.037188000  | 11.409500000 | 26.808870000 |
| C | 10.482230000 | 11.171780000 | 27.070020000 |
| N | 6.946507000  | 11.442300000 | 27.248050000 |
| C | 8.260096000  | 8.130576000  | 27.371480000 |
| C | 9.554279000  | 7.814093000  | 27.788600000 |
| H | 7.434278000  | 8.272212000  | 28.074540000 |
| C | 10.597740000 | 11.043530000 | 28.471380000 |
| H | 12.768580000 | 10.812380000 | 28.601850000 |
| H | 12.200570000 | 7.424663000  | 28.843030000 |
| C | 10.034570000 | 7.596759000  | 29.115780000 |
| C | 11.817940000 | 10.857770000 | 29.142500000 |
| C | 11.359060000 | 7.418428000  | 29.540210000 |
| S | 9.273739000  | 11.068260000 | 29.619850000 |
| S | 8.934937000  | 7.544498000  | 30.468670000 |
| C | 11.686680000 | 10.729510000 | 30.524200000 |
| C | 11.477180000 | 7.265825000  | 30.920610000 |
| C | 10.356620000 | 10.806450000 | 30.961440000 |
| H | 12.518370000 | 10.562130000 | 31.213090000 |
| H | 12.424350000 | 7.129160000  | 31.451990000 |
| C | 10.250680000 | 7.314707000  | 31.604150000 |
| H | 7.684914000  | 10.642160000 | 32.024630000 |
| C | 9.855515000  | 10.683250000 | 32.292660000 |
| C | 8.528237000  | 10.620140000 | 32.720850000 |
| N | 6.603218000  | 7.618956000  | 32.872190000 |
| C | 10.127770000 | 7.207838000  | 33.006870000 |
| C | 7.685284000  | 7.441565000  | 33.297250000 |
| H | 11.079350000 | 7.072835000  | 33.534060000 |
| S | 10.939870000 | 10.564020000 | 33.661310000 |
| C | 8.996810000  | 7.249744000  | 33.808070000 |
| C | 8.392252000  | 10.482070000 | 34.109190000 |
| H | 7.430782000  | 10.381230000 | 34.620650000 |
| C | 9.611953000  | 10.425980000 | 34.788680000 |
| C | 9.110696000  | 7.119343000  | 35.220760000 |
| C | 9.849680000  | 10.244340000 | 36.186580000 |
| H | 12.015510000 | 9.954803000  | 36.295690000 |
| N | 9.203770000  | 7.022712000  | 36.389800000 |
| C | 11.066480000 | 10.013480000 | 36.837180000 |
| S | 8.536086000  | 10.236720000 | 37.330020000 |
| C | 10.935690000 | 9.831756000  | 38.218440000 |
| C | 9.612611000  | 9.912716000  | 38.667060000 |
| H | 11.768930000 | 9.614099000  | 38.893320000 |
| H | 6.951690000  | 9.592434000  | 39.691730000 |



|    |              |              |              |
|----|--------------|--------------|--------------|
| C  | 9.115955000  | 9.763354000  | 39.995640000 |
| C  | 7.777910000  | 9.618491000  | 40.406980000 |
| S  | 10.197530000 | 9.744456000  | 41.364570000 |
| C  | 7.637573000  | 9.481539000  | 41.782840000 |
| H  | 6.681389000  | 9.345289000  | 42.299840000 |
| C  | 8.861349000  | 9.525659000  | 42.488600000 |
| N  | 12.511000000 | 9.767555000  | 43.826600000 |
| C  | 8.957764000  | 9.430351000  | 43.886620000 |
| C  | 11.413550000 | 9.639692000  | 44.232540000 |
| H  | 7.994871000  | 9.307851000  | 44.399320000 |
| C  | 10.086400000 | 9.485945000  | 44.715610000 |
| C  | 9.937362000  | 9.424689000  | 46.116440000 |
| N  | 9.803637000  | 9.402571000  | 47.286280000 |
| Au | 8.202112000  | 6.349675000  | 49.386670000 |
| Au | 9.636991000  | 8.933738000  | 49.388250000 |
| Au | 11.103750000 | 6.351682000  | 49.390490000 |
| Au | 0.745365000  | 0.386117200  | 51.578220000 |
| Au | 3.715213000  | 0.386117200  | 51.578220000 |
| Au | 6.685062000  | 0.386117200  | 51.578220000 |
| Au | 9.654910000  | 0.386117200  | 51.578220000 |
| Au | 12.624760000 | 0.386117200  | 51.578220000 |
| Au | 15.594610000 | 0.386117200  | 51.578220000 |
| Au | 2.230289000  | 2.958081000  | 51.578220000 |
| Au | 5.200138000  | 2.958081000  | 51.578220000 |
| Au | 8.169986000  | 2.958081000  | 51.578220000 |
| Au | 11.139830000 | 2.958081000  | 51.578220000 |
| Au | 14.109680000 | 2.958081000  | 51.578220000 |
| Au | 17.079530000 | 2.958081000  | 51.578220000 |
| Au | 0.745365000  | 5.530046000  | 51.578220000 |
| Au | 3.715213000  | 5.530046000  | 51.578220000 |
| Au | 6.685062000  | 5.530046000  | 51.578220000 |
| Au | 9.654910000  | 5.530046000  | 51.578220000 |
| Au | 12.624760000 | 5.530046000  | 51.578220000 |
| Au | 15.594610000 | 5.530046000  | 51.578220000 |
| Au | 2.230289000  | 8.102010000  | 51.578220000 |
| Au | 5.200138000  | 8.102010000  | 51.578220000 |
| Au | 8.169986000  | 8.102010000  | 51.578220000 |
| Au | 11.139830000 | 8.102010000  | 51.578220000 |
| Au | 14.109680000 | 8.102010000  | 51.578220000 |
| Au | 17.079530000 | 8.102010000  | 51.578220000 |
| Au | 0.745365000  | 10.673970000 | 51.578220000 |
| Au | 3.715213000  | 10.673970000 | 51.578220000 |
| Au | 6.685062000  | 10.673970000 | 51.578220000 |
| Au | 9.654910000  | 10.673970000 | 51.578220000 |
| Au | 12.624760000 | 10.673970000 | 51.578220000 |
| Au | 15.594610000 | 10.673970000 | 51.578220000 |
| Au | 2.230289000  | 13.245940000 | 51.578220000 |
| Au | 5.200138000  | 13.245940000 | 51.578220000 |
| Au | 8.169986000  | 13.245940000 | 51.578220000 |
| Au | 11.139830000 | 13.245940000 | 51.578220000 |
| Au | 14.109680000 | 13.245940000 | 51.578220000 |
| Au | 17.079530000 | 13.245940000 | 51.578220000 |
| Au | 0.745365000  | 2.100760000  | 54.003100000 |
| Au | 3.715213000  | 2.100760000  | 54.003100000 |
| Au | 6.685062000  | 2.100760000  | 54.003100000 |
| Au | 9.654910000  | 2.100760000  | 54.003100000 |
| Au | 12.624760000 | 2.100760000  | 54.003100000 |
| Au | 15.594610000 | 2.100760000  | 54.003100000 |

|    |              |              |              |
|----|--------------|--------------|--------------|
| Au | 2.230289000  | 4.672724000  | 54.003100000 |
| Au | 5.200138000  | 4.672724000  | 54.003100000 |
| Au | 8.169986000  | 4.672724000  | 54.003100000 |
| Au | 11.139830000 | 4.672724000  | 54.003100000 |
| Au | 14.109680000 | 4.672724000  | 54.003100000 |
| Au | 17.079530000 | 4.672724000  | 54.003100000 |
| Au | 0.745365000  | 7.244688000  | 54.003100000 |
| Au | 3.715213000  | 7.244688000  | 54.003100000 |
| Au | 6.685062000  | 7.244688000  | 54.003100000 |
| Au | 9.654910000  | 7.244688000  | 54.003100000 |
| Au | 12.624760000 | 7.244688000  | 54.003100000 |
| Au | 15.594610000 | 7.244688000  | 54.003100000 |
| Au | 2.230289000  | 9.816653000  | 54.003100000 |
| Au | 5.200138000  | 9.816653000  | 54.003100000 |
| Au | 8.169986000  | 9.816653000  | 54.003100000 |
| Au | 11.139830000 | 9.816653000  | 54.003100000 |
| Au | 14.109680000 | 9.816653000  | 54.003100000 |
| Au | 17.079530000 | 9.816653000  | 54.003100000 |
| Au | 0.745365000  | 12.388620000 | 54.003100000 |
| Au | 3.715213000  | 12.388620000 | 54.003100000 |
| Au | 6.685062000  | 12.388620000 | 54.003100000 |
| Au | 9.654910000  | 12.388620000 | 54.003100000 |
| Au | 12.624760000 | 12.388620000 | 54.003100000 |
| Au | 15.594610000 | 12.388620000 | 54.003100000 |
| Au | 2.230289000  | 14.960580000 | 54.003100000 |
| Au | 5.200138000  | 14.960580000 | 54.003100000 |
| Au | 8.169986000  | 14.960580000 | 54.003100000 |
| Au | 11.139830000 | 14.960580000 | 54.003100000 |
| Au | 14.109680000 | 14.960580000 | 54.003100000 |
| Au | 17.079530000 | 14.960580000 | 54.003100000 |
| Au | 2.230289000  | 1.243439000  | 56.427970000 |
| Au | 5.200138000  | 1.243439000  | 56.427970000 |
| Au | 8.169986000  | 1.243439000  | 56.427970000 |
| Au | 11.139830000 | 1.243439000  | 56.427970000 |
| Au | 14.109680000 | 1.243439000  | 56.427970000 |
| Au | 17.079530000 | 1.243439000  | 56.427970000 |
| Au | 0.745365000  | 3.815403000  | 56.427970000 |
| Au | 3.715213000  | 3.815403000  | 56.427970000 |
| Au | 6.685062000  | 3.815403000  | 56.427970000 |
| Au | 9.654910000  | 3.815403000  | 56.427970000 |
| Au | 12.624760000 | 3.815403000  | 56.427970000 |
| Au | 15.594610000 | 3.815403000  | 56.427970000 |
| Au | 2.230289000  | 6.387367000  | 56.427970000 |
| Au | 5.200138000  | 6.387367000  | 56.427970000 |
| Au | 8.169986000  | 6.387367000  | 56.427970000 |
| Au | 11.139830000 | 6.387367000  | 56.427970000 |
| Au | 14.109680000 | 6.387367000  | 56.427970000 |
| Au | 17.079530000 | 6.387367000  | 56.427970000 |
| Au | 0.745365000  | 8.959331000  | 56.427970000 |
| Au | 3.715213000  | 8.959331000  | 56.427970000 |
| Au | 6.685062000  | 8.959331000  | 56.427970000 |
| Au | 9.654910000  | 8.959331000  | 56.427970000 |
| Au | 12.624760000 | 8.959331000  | 56.427970000 |
| Au | 15.594610000 | 8.959331000  | 56.427970000 |
| Au | 2.230289000  | 11.531300000 | 56.427970000 |
| Au | 5.200138000  | 11.531300000 | 56.427970000 |
| Au | 8.169986000  | 11.531300000 | 56.427970000 |
| Au | 11.139830000 | 11.531300000 | 56.427970000 |

|    |              |              |              |
|----|--------------|--------------|--------------|
| Au | 14.109680000 | 11.531300000 | 56.427970000 |
| Au | 17.079530000 | 11.531300000 | 56.427970000 |
| Au | 0.745365000  | 14.103260000 | 56.427970000 |
| Au | 3.715213000  | 14.103260000 | 56.427970000 |
| Au | 6.685062000  | 14.103260000 | 56.427970000 |
| Au | 9.654910000  | 14.103260000 | 56.427970000 |
| Au | 12.624760000 | 14.103260000 | 56.427970000 |
| Au | 15.594610000 | 14.103260000 | 56.427970000 |
| Au | 0.745365000  | 0.386117200  | 58.852840000 |
| Au | 3.715213000  | 0.386117200  | 58.852840000 |
| Au | 6.685062000  | 0.386117200  | 58.852840000 |
| Au | 9.654910000  | 0.386117200  | 58.852840000 |
| Au | 12.624760000 | 0.386117200  | 58.852840000 |
| Au | 15.594610000 | 0.386117200  | 58.852840000 |
| Au | 2.230289000  | 2.958081000  | 58.852840000 |
| Au | 5.200138000  | 2.958081000  | 58.852840000 |
| Au | 8.169986000  | 2.958081000  | 58.852840000 |
| Au | 11.139830000 | 2.958081000  | 58.852840000 |
| Au | 14.109680000 | 2.958081000  | 58.852840000 |
| Au | 17.079530000 | 2.958081000  | 58.852840000 |
| Au | 0.745365000  | 5.530046000  | 58.852840000 |
| Au | 3.715213000  | 5.530046000  | 58.852840000 |
| Au | 6.685062000  | 5.530046000  | 58.852840000 |
| Au | 9.654910000  | 5.530046000  | 58.852840000 |
| Au | 12.624760000 | 5.530046000  | 58.852840000 |
| Au | 15.594610000 | 5.530046000  | 58.852840000 |
| Au | 2.230289000  | 8.102010000  | 58.852840000 |
| Au | 5.200138000  | 8.102010000  | 58.852840000 |
| Au | 8.169986000  | 8.102010000  | 58.852840000 |
| Au | 11.139830000 | 8.102010000  | 58.852840000 |
| Au | 14.109680000 | 8.102010000  | 58.852840000 |
| Au | 17.079530000 | 8.102010000  | 58.852840000 |
| Au | 0.745365000  | 10.673970000 | 58.852840000 |
| Au | 3.715213000  | 10.673970000 | 58.852840000 |
| Au | 6.685062000  | 10.673970000 | 58.852840000 |
| Au | 9.654910000  | 10.673970000 | 58.852840000 |
| Au | 12.624760000 | 10.673970000 | 58.852840000 |
| Au | 15.594610000 | 10.673970000 | 58.852840000 |
| Au | 2.230289000  | 13.245940000 | 58.852840000 |
| Au | 5.200138000  | 13.245940000 | 58.852840000 |
| Au | 8.169986000  | 13.245940000 | 58.852840000 |
| Au | 11.139830000 | 13.245940000 | 58.852840000 |
| Au | 14.109680000 | 13.245940000 | 58.852840000 |
| Au | 17.079530000 | 13.245940000 | 58.852840000 |
